# Supplementary material for: A Combination of Metabolomics and Machine Learning Results in the Identification of a New Cyst Nematode Hatching Factor
Source: MDPI journal article supplement (doi:10.3390/metabo12060551), 2022-06-16
Supplement: s1 [file s1]

## Supplemental materials

*Table S1 (excel xlsx document). Significantly ( $p < 0.05$ ) correlating (Pearson) features with solA and hatching in both positive and negative mode LC-ESI-QTOF-MS data. The cut-off was a correlation coefficient of 0.10. Features with a high degree of correlation (Pearson's correlation coefficient  $> 0.5$ ) are coloured in red. Features with a moderate degree of correlation (Pearson's correlation coefficient  $0.3 - 0.5$ ) are coloured in orange. Features with a low degree of correlation (Pearson's correlation coefficient  $< 0.3$ ) are coloured in yellow.*

*Table S2: p values of Random Forest permutations*

| dataset              | p value     | # permutations |
|----------------------|-------------|----------------|
| exudate (+) hatching | 0.042422482 | 100            |
| exudate (+) solA     | 0.042422482 | 100            |
| exudate (-) hatching | 0.045679047 | 100            |
| exudate (-) solA     | 0.042422482 | 100            |
| extract (+) hatching | 0.056267724 | 150            |
| extract (+) solA     | 0.042422482 | 150            |
| extract (-) hatching | 0.150932136 | 150            |
| extract (-) solA     | 0.042422482 | 150            |

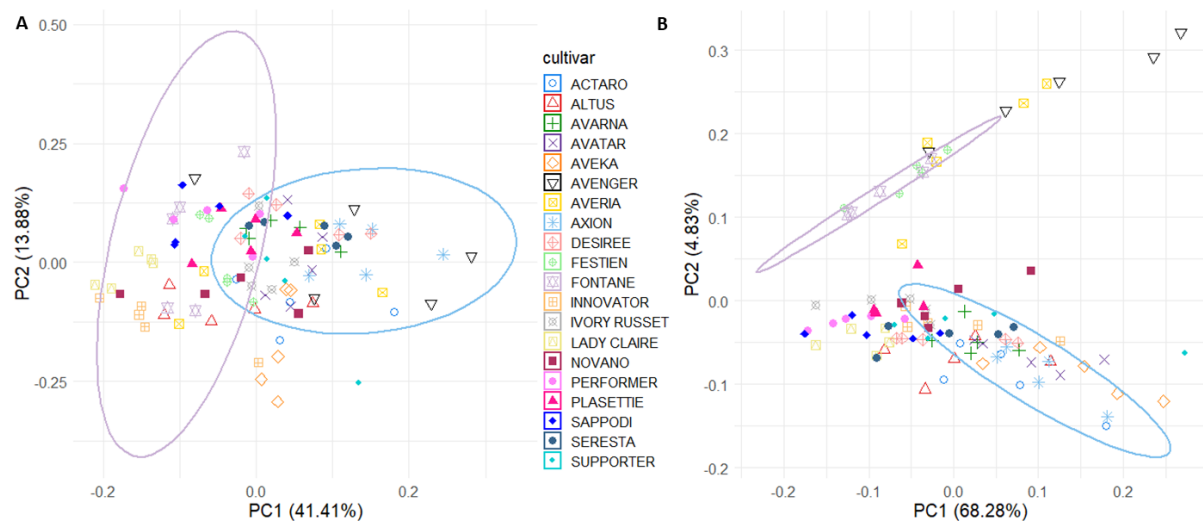

*Figure S1: PCA plots of positive (A) and negative (B) mode of LC-ESI-QTOF-MS data from root exudate samples of selected genotypes (Figure 1A). As an example, it is shown that the root exudates of cultivars Axion and Fontane vary metabolically.*

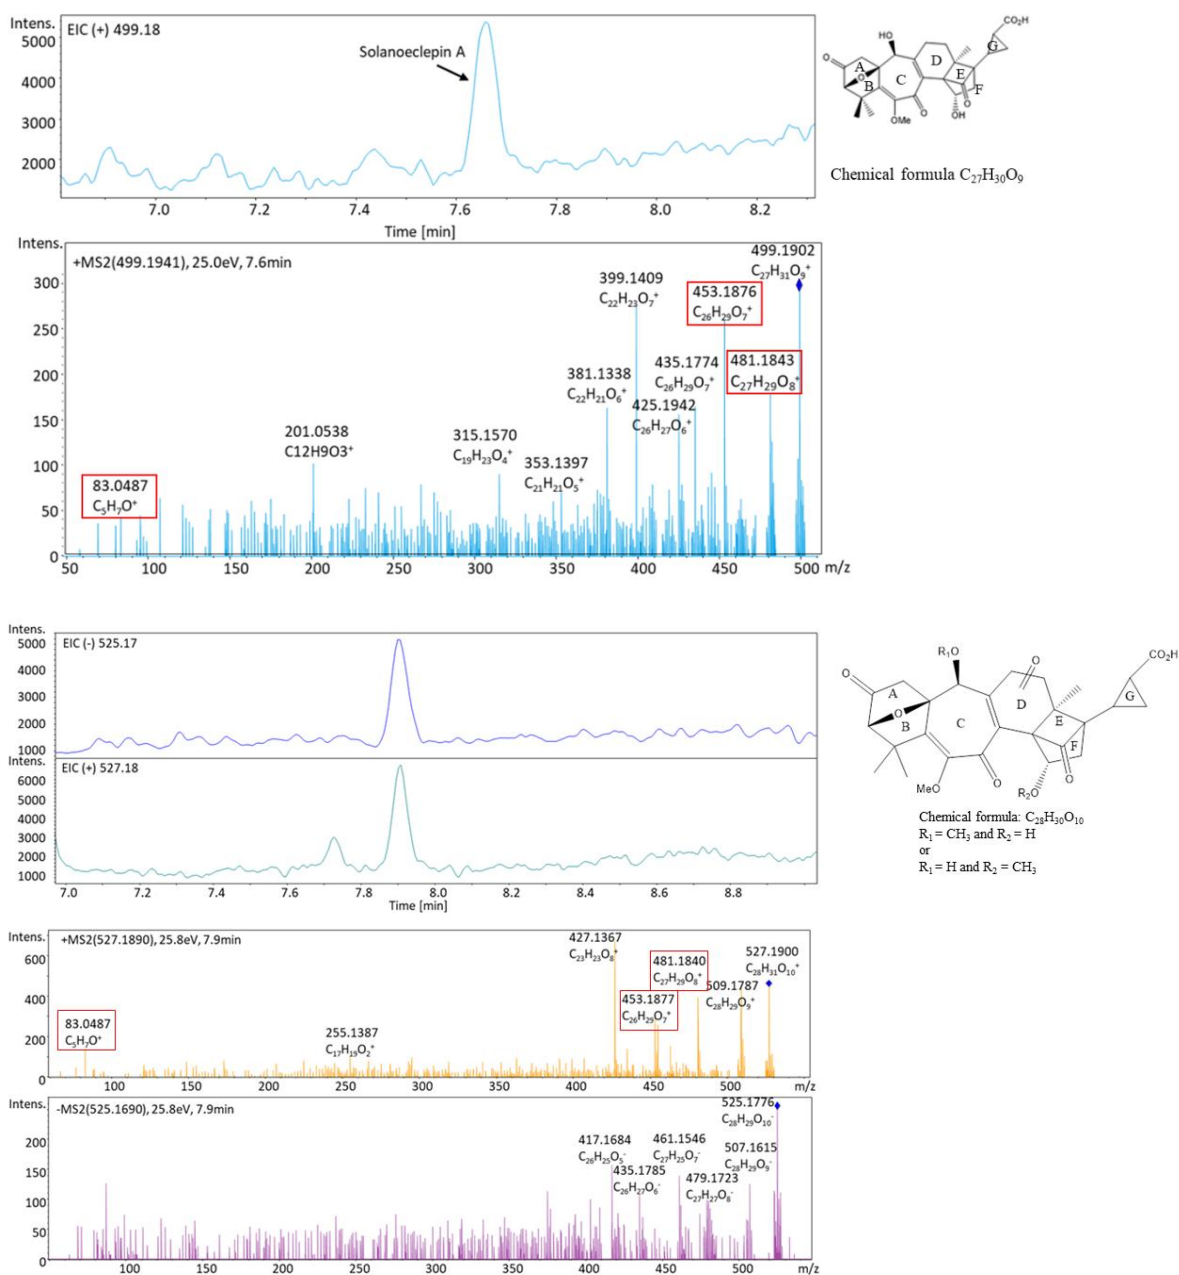

Figure S2: MS2 spectra of positive mode solA (top) and positive and negative mode of tentative solB (bottom) including the putative molecular structure. These were extracted from whole root exudate LC-ESI-QTOF-MS data. Overlapping fragments between these two metabolites are marked with a red box.

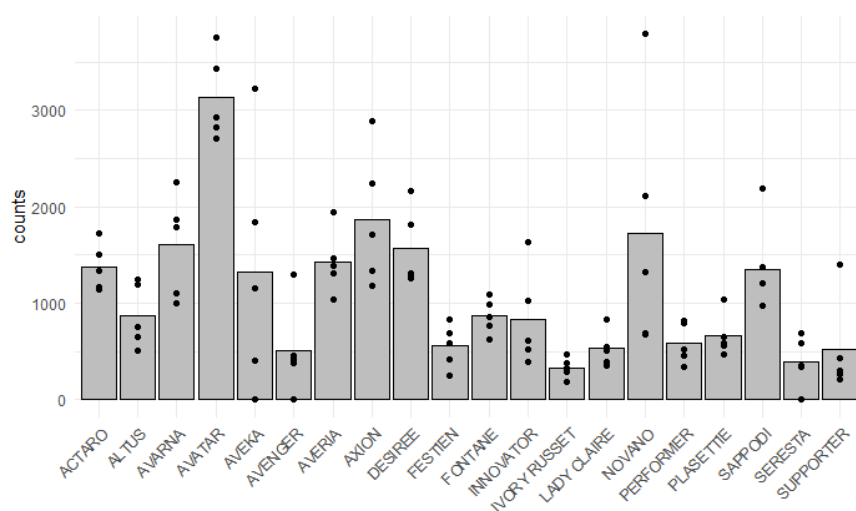

Figure S3: mass intensity (corrected for root weight) of compound with  $m/z$  525.18 (-) in all LC-ESI-QTOF-MS analysed samples

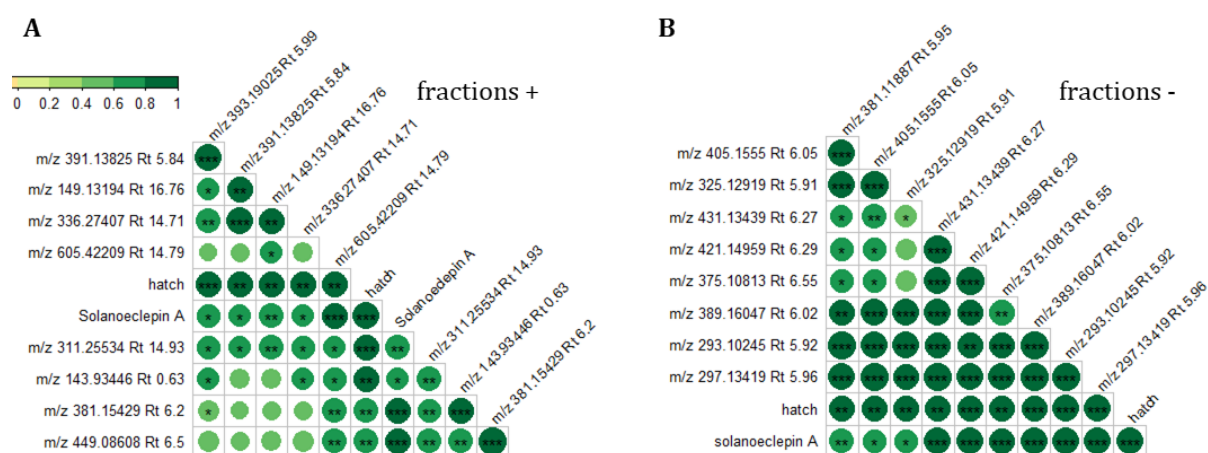

Figure S4: the top 10 Pearson's correlations between metabolites in positive (A) and negative (B) mode detected by LC-ESI-QTOF-MS analysis of fractions 8, 9, 10 and 11 of Avatar, Desiree and Seresta cultivars and hatching of PCN.

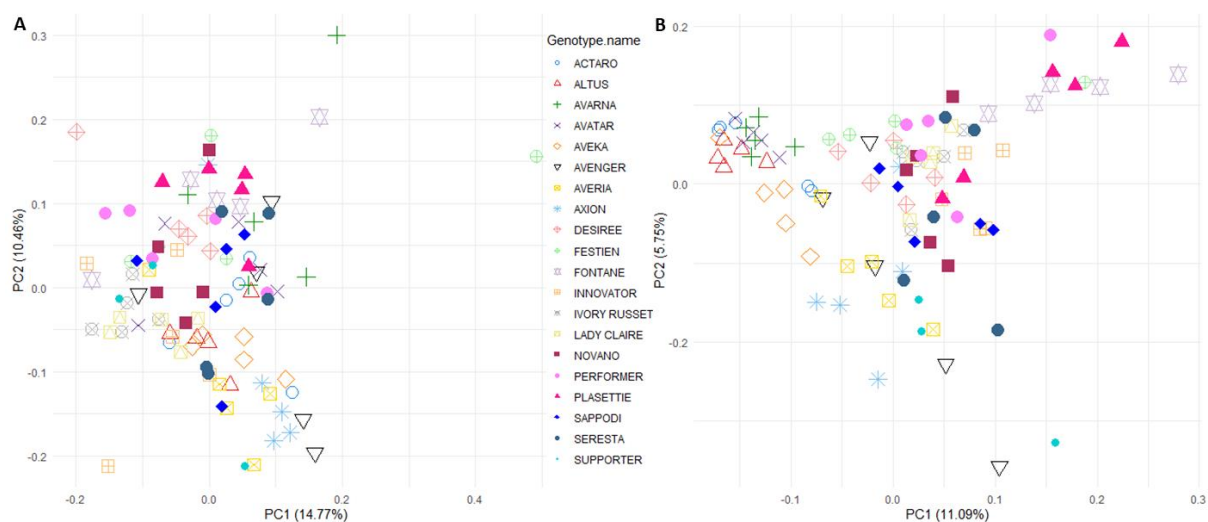

Figure S5: PCA plots of positive (A) and negative (B) mode of LC-ESI-QTOF-MS data from root extract samples of selected genotypes (Figure 1A)

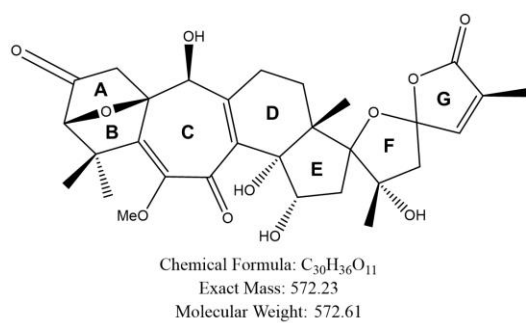

Figure S6: putative structure of compound detected in root extract that highly correlates with *solA* as well as hatching with  $m/z$  571.22 (-).
